# Supplementary material for: Rapid synthesis of highly luminescent and stable Au20 nanoclusters for active tumor-targeted imaging in vitro and in vivo
Source: Royal Society of Chemistry journal article supplement (doi:10.1039/c3nr05269a), 2013-11-29
Supplement: c3nr05269a.pdf [file c3nr05269a.pdf]

Electronic Supporting Information (ESI) for *Nanoscale*  
This journal is © The Royal Society of Chemistry 2013

## Electronic Supporting Information

*for*

# **Rapid Synthesis of Highly Luminescent and Stable Au<sub>20</sub> Nanoclusters for Active Tumor-Targeted Imaging *in vitro* and *in vivo***

Pu Zhang<sup>a,c</sup>, Xiao Xi Yang<sup>b</sup>, Yi Wang<sup>b</sup>, Ning Wei Zhao<sup>d</sup>, Zu Hong Xiong<sup>c</sup>, and Cheng Zhi Huang<sup>a,b\*</sup>

<sup>a</sup>*Education Ministry Key Laboratory on Luminescence and Real-Time Analysis, College of Pharmaceutical Sciences,* <sup>b</sup>*School of Chemistry and Chemical Engineering, and* <sup>c</sup>*School of Physical Science and Technology, Southwest University, Chongqing 400715, P. R. China;* <sup>d</sup>*Life Science & Clinical Medicine Department, Shimadzu (China) Co., Shanghai 200052, P. R. China*

## **Experimental Details**

**Preparation of cell lysate.** Hep-2 cells were grown in RPMI-1640 supplemented with 10 % fetal bovine serum in an incubator (37 °C, 5% CO<sub>2</sub>). The cells were washed twice by PBS and then repeated to freeze and thaw three times to make sure the cells were completely lysated. In order to remove the cell debris and proteins, the product was subsequently centrifuged at 14000 rpm for 10 min and filtered by 0.22 μm microporous membrane. The lysate was collected and stored at 4 °C.

**Preparation of human serum samples.** The healthy human serum samples were obtained from the local hospital. Firstly, they were kept in the centrifuge cups and incubated at 37 °C for clotting without adding any anticoagulant. After the blood clotting, the serum with yellow color was obtained immediately by the centrifugation (3000 rpm, 15 min). The supernatant was carefully collected and diluted by PB buffer (pH 7.4), and then kept in 4 °C.

---

\* Corresponding author. Tel.: +86-23-68254659; Fax: +86-23-68367257. E-mail: [chengzhi@swu.edu.cn](mailto:chengzhi@swu.edu.cn) (C.Z. Huang)

Electronic Supporting Information (ESI) for *Nanoscale*  
This journal is © The Royal Society of Chemistry 2013

## Tables and Figures

**Table S1.** Synthesis of Au<sub>20</sub>NCs with different concentrations of HAuCl<sub>4</sub>.

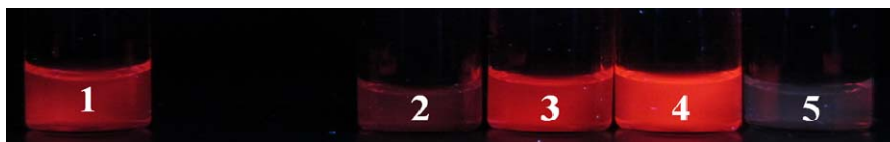

| Sample                               | 1      | 2      | 3      | 4      | 5      |
|--------------------------------------|--------|--------|--------|--------|--------|
| $c_{\text{HAuCl}_4}$                 | Ref. 1 | 3.8 mM | 4.8 mM | 5.8 mM | 7.7 mM |
| QY(%, $\lambda_{\text{ex}}$ :470 nm) | 6.3    | 2.8    | 8.2    | 15.2   | 1.8    |

$c_{\text{BSA}}$ : 19.2 mg/mL,  $c_{\text{NaOH}}$ : 38 mM, changed the concentration of HAuCl<sub>4</sub>.

**Table S2.** Synthesis of Au<sub>20</sub>NCs with different reaction times.

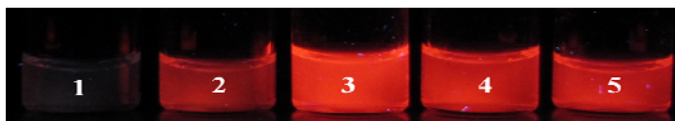

| Sample                               | 1   | 2   | 3    | 4    | 5   |
|--------------------------------------|-----|-----|------|------|-----|
| time (min)                           | 20  | 40  | 60   | 80   | 120 |
| QY(%, $\lambda_{\text{ex}}$ :470 nm) | 0.7 | 4.8 | 14.5 | 11.0 | 8.9 |

$c_{\text{BSA}}$ : 19.2 mg/mL,  $c_{\text{HAuCl}_4}$ : 5.8 mM,  $c_{\text{NaOH}}$ : 38 mM, changed the reaction time.

**Table S3.** Synthesis of Au<sub>20</sub>NCs at different temperatures.

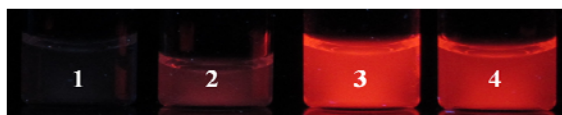

| Sample                               | 1    | 2   | 3    | 4    |
|--------------------------------------|------|-----|------|------|
| T (°C)                               | 60   | 80  | 100  | 120  |
| QY(%, $\lambda_{\text{ex}}$ :470 nm) | 0.98 | 2.7 | 14.8 | 11.8 |

$c_{\text{BSA}}$ : 19.2 mg/mL,  $c_{\text{HAuCl}_4}$ : 5.8 mM,  $c_{\text{NaOH}}$ : 38 mM, changed the reaction temperature.

Electronic Supporting Information (ESI) for *Nanoscale*  
 This journal is © The Royal Society of Chemistry 2013

**Table S4.** Synthesis of Au<sub>20</sub>NCs with different concentrations of NaOH.



| Sample                                | 1    | 2   | 3    | 4   |
|---------------------------------------|------|-----|------|-----|
| NaOH (mM)                             | 38   | 58  | 77   | 123 |
| QY(%, $\lambda_{\text{ex}}$ : 470 nm) | 13.9 | 2.1 | 0.08 | 0.1 |

$c_{\text{BSA}}$ : 19.2 mg/mL,  $c_{\text{HAuCl}_4}$ : 5.8 mM, changed the concentration of NaOH.

**Table S5.** Comparison of the present work with previously reported methods for the synthesis of AuNCs.

| Method               | Type of AuNCs                            | Condition                                          | Time   | QY (%)      | Reference |
|----------------------|------------------------------------------|----------------------------------------------------|--------|-------------|-----------|
| Chemical reduction   | BSA- Au <sub>20</sub> NCs                | 100 °C, pH 10                                      | 1 h    | ~15         | This work |
| Chemical reduction   | BSA-Au <sub>25</sub> NCs                 | 37 °C, pH 12                                       | 12 h   | ~6          | [1]       |
| Chemical reduction   | BSA-Au <sub>8,13,25</sub> NCs            | 37 °C, alkaline solution, reduced by ascorbic acid | 6 h    | ~5.7        | [2]       |
| Chemical reduction   | BSA-Au <sub>25</sub> NCs                 | 37 °C, pH 11, reduced by ascorbic acid             | 5 h    | ~5.5        | [3]       |
| Chemical reduction   | PAMAM-Au <sub>23</sub> NCs               | 37 °C, reduced by ascorbic acid                    | 3 d    | 9           | [4]       |
| Phase transfer       | Thiolated peptides-Au <sub>38</sub> NCs  | Complicated method                                 | > 3 h  | Not mention | [5]       |
| Galvanic replacement | glutathione-AuNCs                        | Using silver dots as template at 80 °C             | > 52 h | 10          | [6]       |
| Chemical reduction   | PhC <sub>2</sub> S -Au <sub>25</sub> NCs | ice/acetone bath                                   | 5-10 h | 0.8         | [7]       |

Electronic Supporting Information (ESI) for *Nanoscale*  
This journal is © The Royal Society of Chemistry 2013

|                                |                                                     |                                                 |        |       |      |
|--------------------------------|-----------------------------------------------------|-------------------------------------------------|--------|-------|------|
| Chemical reduction             | Insulin-AuNCs                                       | 4 °C, in Na <sub>3</sub> PO <sub>4</sub> buffer | 12 h   | 7     | [8]  |
| Chemical reduction             | Transferrin family protein-AuNCs                    | Alkaline solution                               | 24 h   | 1.2-6 | [9]  |
| Chemical reduction             | Apo ferritin protein-AuNCs                          | Alkaline solution                               | 36 h   | 8.2   | [10] |
| Photochemical synthesis        | pentaerythritol tetrakis 3-mercaptopropionate-AuNCs | Light source (8 W, $\lambda$ :365 nm)           | 4 h    | 5.3   | [11] |
| Chemical reduction             | L-3,4-dihydroxyphenylalanine-AuNCs                  | Room temperature                                | 15 min | 1.7   | [12] |
| Phase-transfer                 | GSH-AuNCs                                           | NaBH <sub>4</sub> , NaOH, CTAB                  | > 1 d  | 5.4   | [13] |
| Core reduction/ligand exchange | GSH-Au <sub>22</sub> NCs                            | Complicated method                              | > 3 d  | 0.19  | [14] |

---

**Table S6.** Fluorescence lifetimes ( $\tau$ ) of BSA and the as-prepared BSA-Au<sub>20</sub>NCs.

| Sample                   | $\tau_1$ (ns) | $\tau_2$ (ns) | $\tau_3$ (ns) |
|--------------------------|---------------|---------------|---------------|
| BSA-Au <sub>20</sub> NCs | 1.26 (1.16%)  | 10.4 (1.66%)  | 453 (97.2%)   |
| BSA                      | 4.12 (100%)   | /             | /             |

Electronic Supporting Information (ESI) for *Nanoscale*  
This journal is © The Royal Society of Chemistry 2013

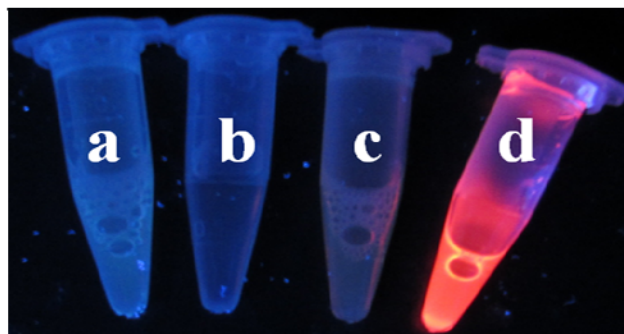

**Figure S1.** The picture showing the samples under a UV lamp irradiation ( $\lambda_{\text{ex}}$ : 365 nm). The samples were prepared using the standard procedure, except for: (a) without adding  $\text{HAuCl}_4$ ; (b) without adding BSA; (c) without adding NaOH. The product as shown in (d) was prepared with a standard protocol.

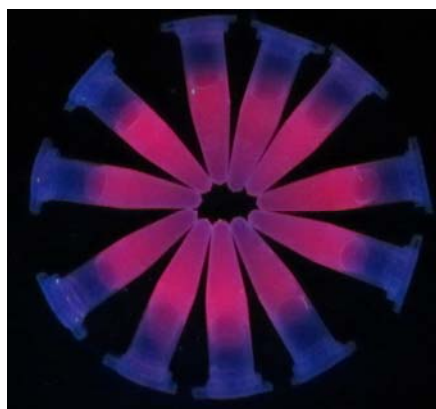

**Figure S2.** Reproducibility of the present method for the synthesis of BSA- $\text{Au}_{20}\text{NCs}$ . 11 batches of the products with essentially the same fluorescent intensity and wavelength were obtained.

Electronic Supporting Information (ESI) for *Nanoscale*  
This journal is © The Royal Society of Chemistry 2013

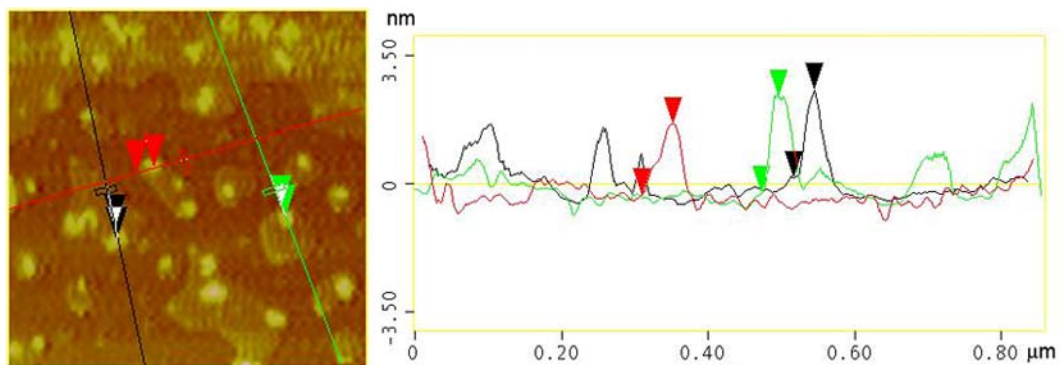

**Figure S3.** AFM image and the corresponding height measurement of the Au<sub>20</sub>NCs.

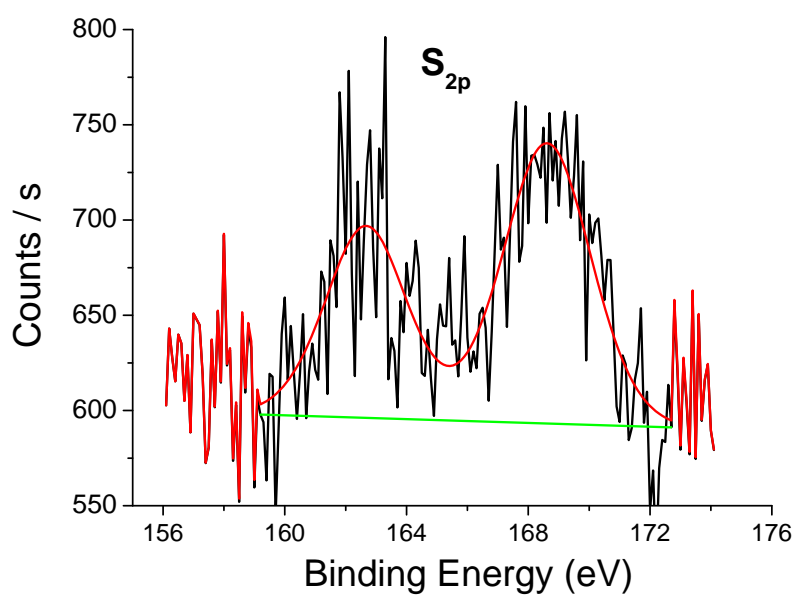

**Figure S4.** XPS spectrum of the BSA-Au<sub>20</sub>NCs showing the binding energy of S<sub>2p</sub>.

Electronic Supporting Information (ESI) for *Nanoscale*  
This journal is © The Royal Society of Chemistry 2013

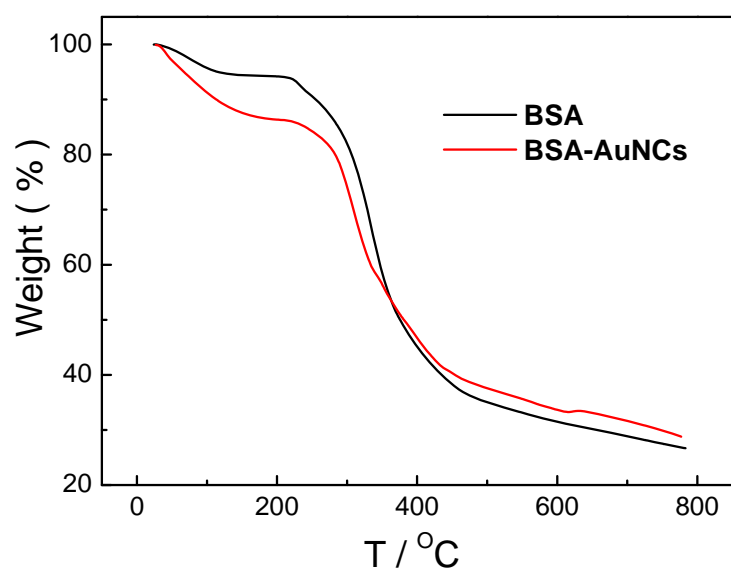

**Figure S5.** TGA analysis of the as-prepared BSA-Au<sub>20</sub>NCs and pure BSA.

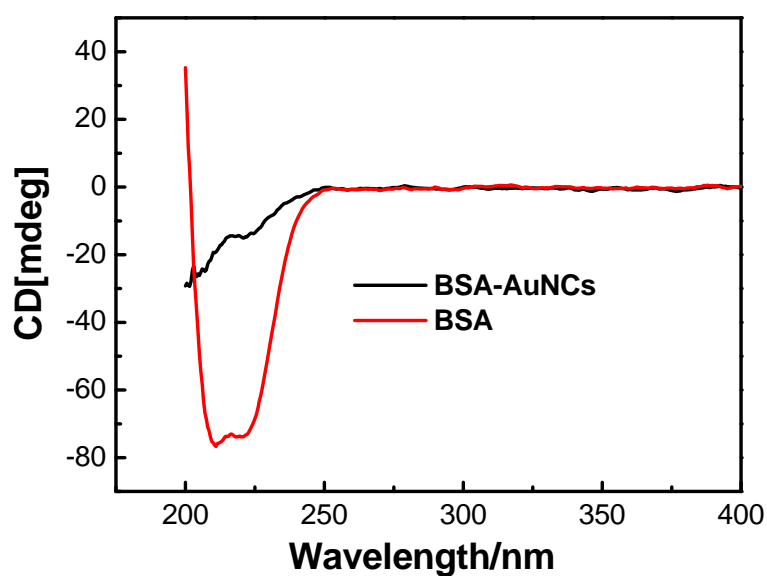

**Figure S6.** CD spectra of BSA-Au<sub>20</sub>NCs and pure BSA.

Electronic Supporting Information (ESI) for *Nanoscale*  
This journal is © The Royal Society of Chemistry 2013

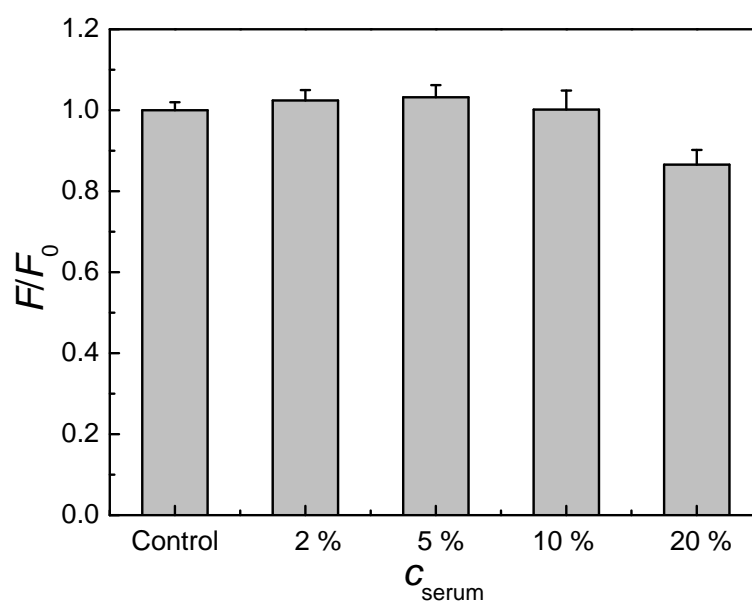

**Figure S7.** Fluorescence stability of the  $\text{Au}_{20}\text{NCs}$  in different concentrations of serum.

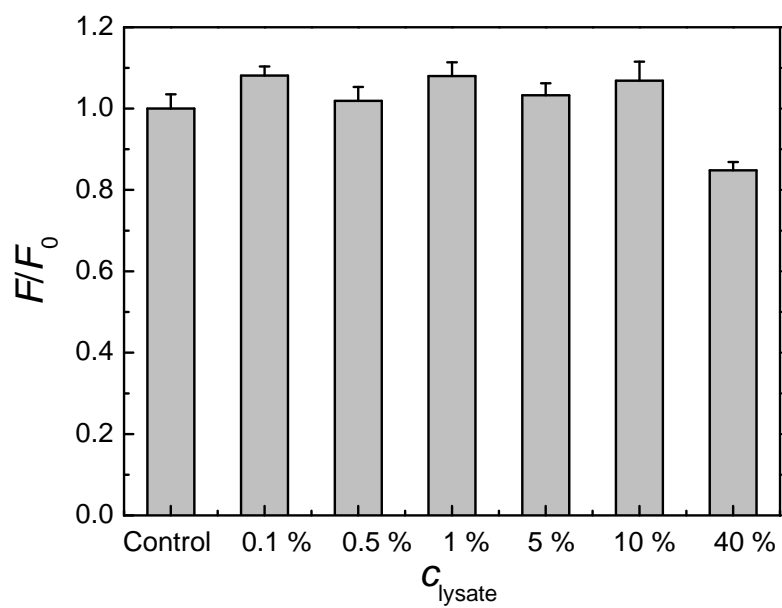

**Figure S8.** Fluorescence stability of  $\text{Au}_{20}\text{NCs}$  in different concentrations of cell lysate.



Electronic Supporting Information (ESI) for *Nanoscale*  
This journal is © The Royal Society of Chemistry 2013

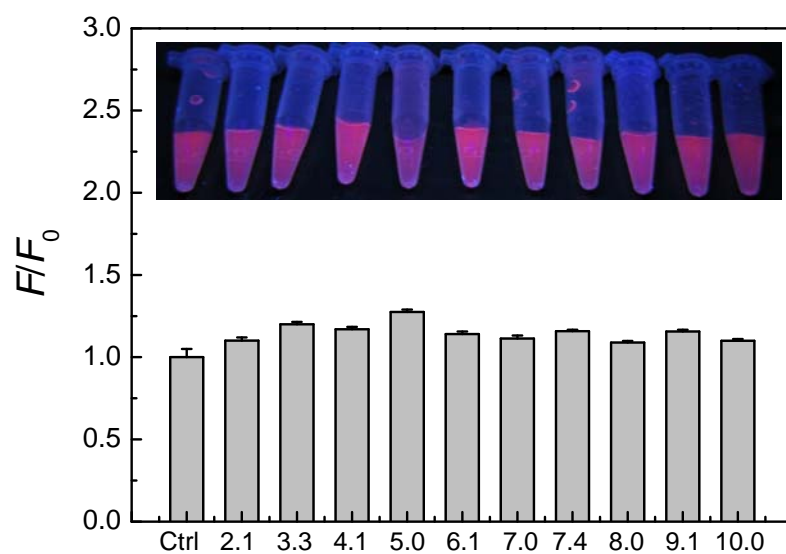

**Figure S9.** Fluorescence intensity of the as-obtained Au<sub>20</sub>NCs at different pH values. The inset shows the corresponding photographs of the samples at different pH values under UV light irradiation.

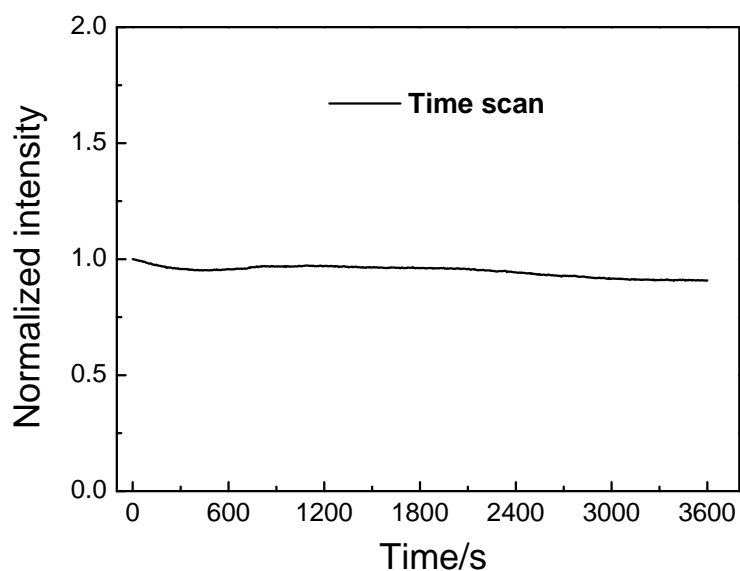

**Figure S10.** Study on the photostability of the Au<sub>20</sub>NCs by continuous irradiation for 1 h with a UV light.

Electronic Supporting Information (ESI) for *Nanoscale*  
This journal is © The Royal Society of Chemistry 2013

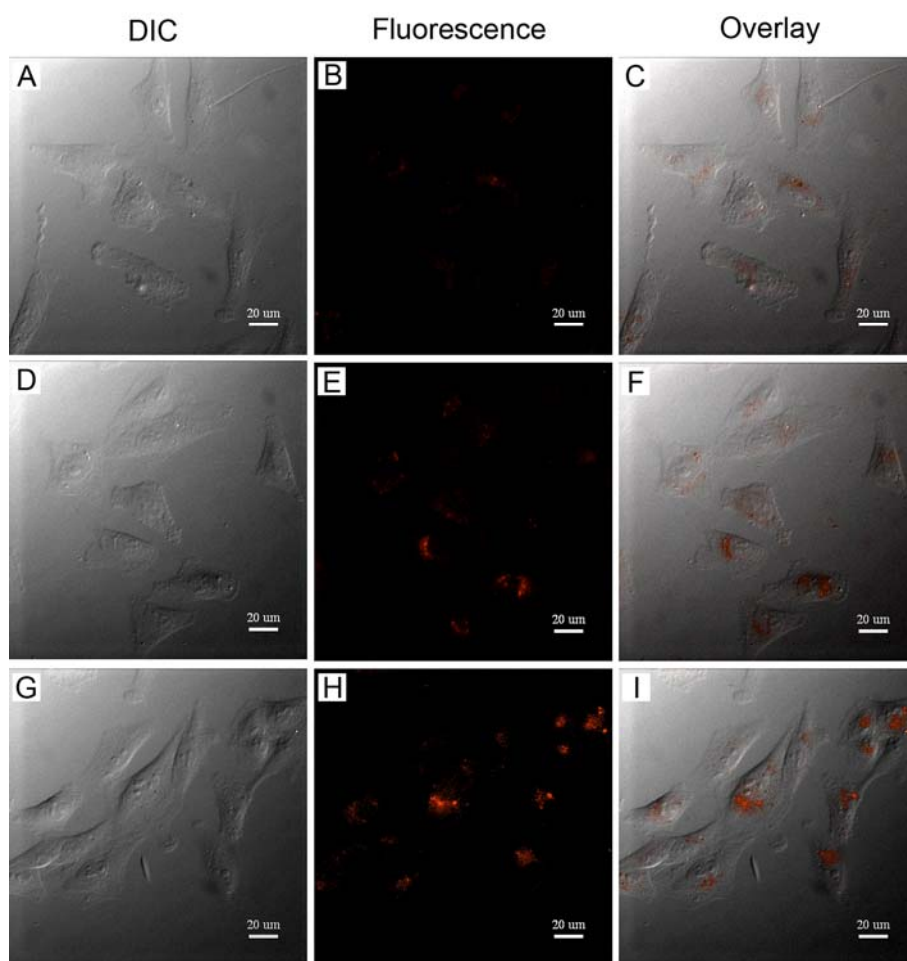

**Figure S11.** Delivery of Au<sub>20</sub>NCs with different concentrations into the living Hep-2 cells: (A-C) 6 mg/mL, (B-F) 8 mg/mL, and (G-I) 10 mg/mL. Differential interference contrast (DIC) (A, D, G), fluorescence (B, E, H), as well as the overlay of DIC and fluorescence mode (C, F, I) were given. Scale bars, 20 μm.

Electronic Supporting Information (ESI) for *Nanoscale*  
This journal is © The Royal Society of Chemistry 2013

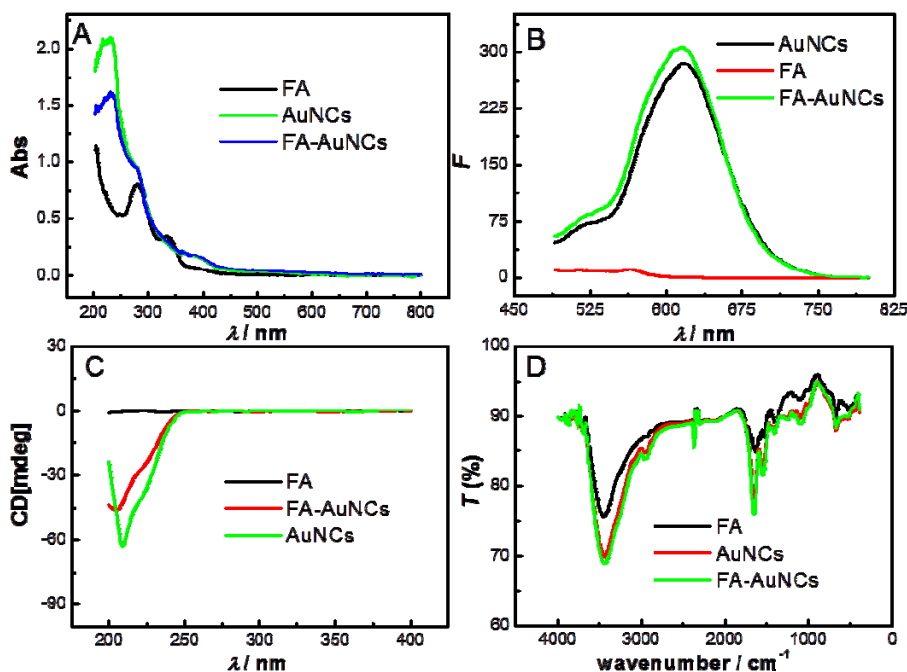

**Figure S12.** Characterization of the conjugation of Au<sub>20</sub>NCs with FA: (a) UV-Vis spectra; (b) fluorescence spectra; (c) CD spectra; (d) FT-IR spectra.

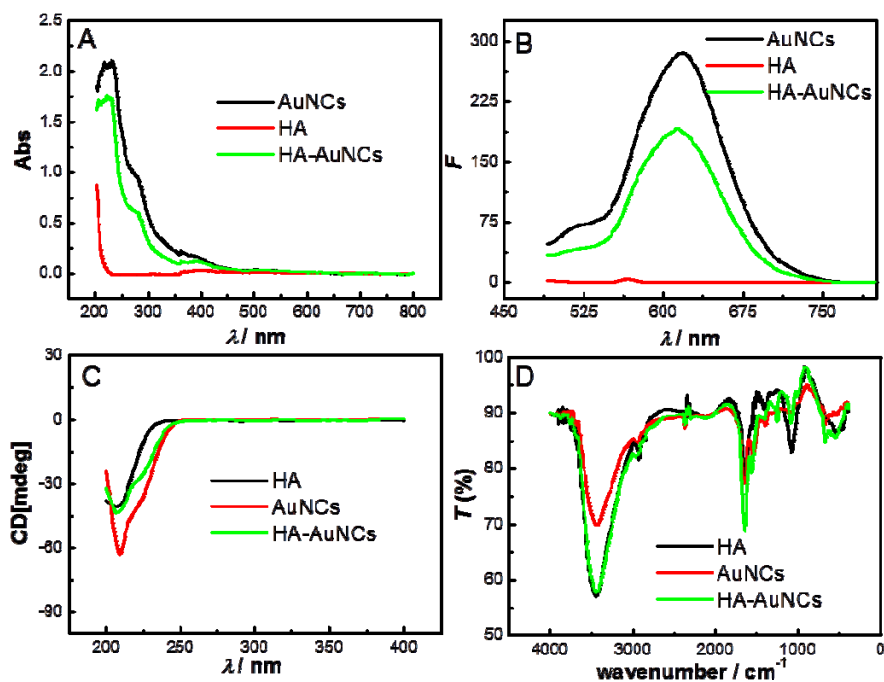

**Figure S13.** Characterization of the conjugation of Au<sub>20</sub>NCs with HA: (a) UV-Vis spectra; (b) fluorescence spectra; (c) CD spectra; (d) FT-IR spectra.

Electronic Supporting Information (ESI) for *Nanoscale*  
This journal is © The Royal Society of Chemistry 2013

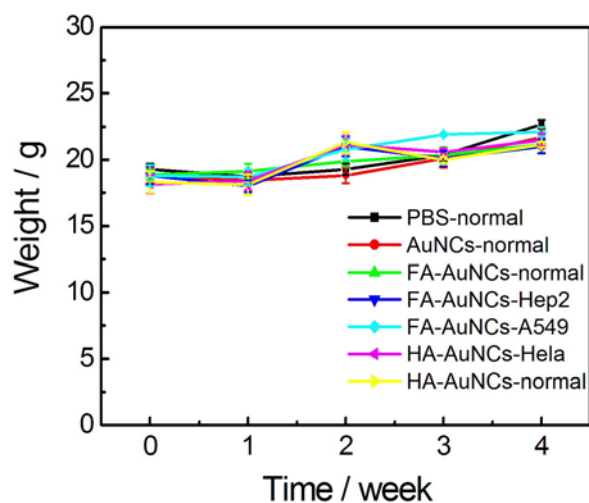

**Figure S14.** Change in body mass of different nude mice (tumor-bearing or not) injected with 200  $\mu\text{L}$  ( $60 \text{ mg mL}^{-1}$ )  $\text{Au}_{20}\text{NCs}$ , FA- $\text{Au}_{20}\text{NCs}$ , and HA- $\text{Au}_{20}\text{NCs}$ , respectively ( $n=3$ ). The mice injected with 200  $\mu\text{L}$  PBS were used as a control group for comparison.

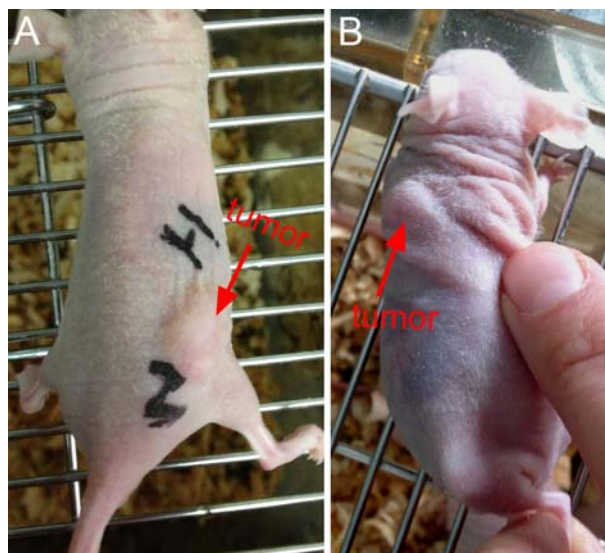

**Figure S15.** Pictures of the mice bearing a (A) HeLa and (B) Hep-2 tumor, respectively, as marked with the arrows.

Electronic Supporting Information (ESI) for *Nanoscale*  
This journal is © The Royal Society of Chemistry 2013

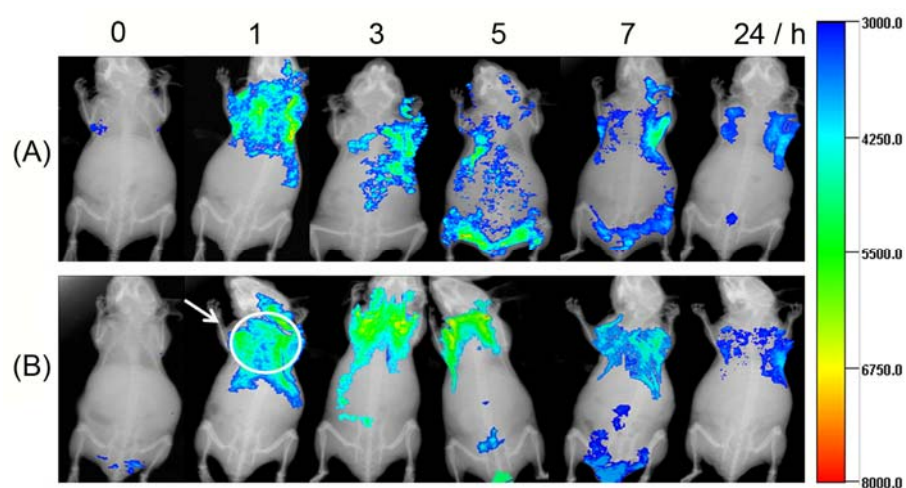

**Figure S16.** Dynamic distributions of Au<sub>20</sub>NCs (60 mg/mL) in (A) a normal nude mouse and (B) a Hep-2 tumor-bearing nude mouse, respectively. The images were captured by a NIR fluorescence imaging system after the Au<sub>20</sub>NCs has been circulated for different time intervals. The white arrow indicates the location of the tumor.

Electronic Supporting Information (ESI) for *Nanoscale*  
This journal is © The Royal Society of Chemistry 2013

## References

- [1] J. Xie, Y. Zheng, J. Y. Ying, *J. Am. Chem. Soc.*, 2009, **131**, 888-889.
- [2] X. L. Guevel, B. Hotzer, G. Jung, K. Hollemeyer, V. Trouillet, M. Schneider, *J. Phys. Chem. C*, 2011, **115**, 10955-10963.
- [3] A. Retnakumari, S. Setua, D. Menon, P. Ravindran, H. Muhammed, T. Pradeep, S. Nair, M. Koyakutty, *Nanotechnology*, 2010, **21**, 55103-55115.
- [4] Y. Bao, C. Zhong, D. M. Vu, J. P. Temirov, R. B. Dyer, J. S. Martinez, *J. Phys. Chem. C*, 2007, **111**, 12194-12198.
- [5] L. Fabris, S. Antonello, L. Armelao, R. L. Donkers, F. Polo, C. Toniolo, F. Maran, *J. Am. Chem. Soc.*, 2006, **128**, 326-336.
- [6] C. Wang, Y. Wang, L. Xu, X. Shi, X. Li, X. Xu, H. Sun, B. Yang, Q. Lin, *Small*, 2013, **9**, 413-420.
- [7] Z. Tang, T. Ahuja, S. Wang, G. Wang, *Nanoscale*, 2012, **4**, 4119-4124.
- [8] C.-L. Liu, H.-T. Wu, Y.-H. Hsiao, C.-W. Lai, C.-W. Shih, Y.-K. Peng, K.-C. Tang, H.-W. Chang, Y.-C. Chien, J.-K. Hsiao, J.-T. Cheng, P.-T. Chou, *Angew. Chem. Int. Ed.*, 2011, **50**, 7056-7060.
- [9] P. L. Xavier, K. Chaudhari, P. K. Verma, S. K. Pal, T. Pradeep, *Nanoscale*, 2010, **2**, 2769-2776.
- [10] C. Sun, H. Yang, Y. Yuan, X. Tian, L. Wang, Y. Guo, L. Xu, J. Lei, N. Gao, G. J. Anderson, X.-J. Liang, C. Chen, Y. Zhao, G. Nie, *J. Am. Chem. Soc.*, 2011, **133**, 8617-8624.
- [11] H. Zhang, X. Huang, L. Li, G. Zhang, I. Hussain, Z. Li, B. Tan, *Chem. Commun.*, 2012, **48**, 567-569.
- [12] J. A. Ho, H.-C. Chang, W.-T. Su, *Anal. Chem.*, 2012, **84**, 3246-3253.
- [13] X. Yuan, Z. Luo, Q. Zhang, X. Zhang, Y. Zheng, J. Y. Lee, J. Xie, *ACS Nano*, 2011, **5**, 8800-8808.
- [14] E. S. Shibu, B. Radha, P. K. Verma, P. Bhyrappa, G. U. Kulkarni, S. K. Pal, T. Pradeep, *ACS Appl. Mater. Interfaces*, 2009, **10**, 2199-2210.
